# Supplementary material
Source: PubMed Central journal article supplement (PMC5100766)
Supplement: supp_pp.16.01079_PP2016-01079DR1_Supplemental_Figure_1.pdf [file supp_pp.16.01079_PP2016-01079DR1_Supplemental_Figure_1.pdf]

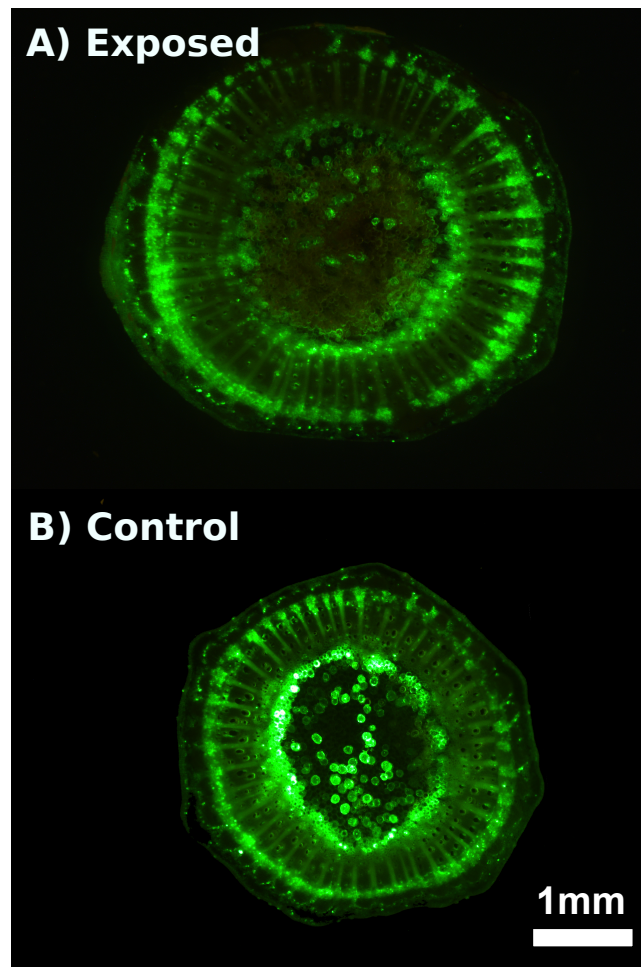

**Figure S1.** Cross section of the upper stem part of a grapevine plant that was scanned with HRCT 10 days before treatment with fluorescein-diacetate. The fluorescent, green colored cells represent living cells, which were slightly more pronounced in the control image (B) compared to the area that was exposed to x-ray beam (A). White bar = 1mm scale.
