# Supplementary material
Source: PubMed Central journal article supplement (PMC5100766)
Supplement: supp_pp.16.01079_PP2016-01079DR1_Supplemental_Figure_2.pdf [file supp_pp.16.01079_PP2016-01079DR1_Supplemental_Figure_2.pdf]

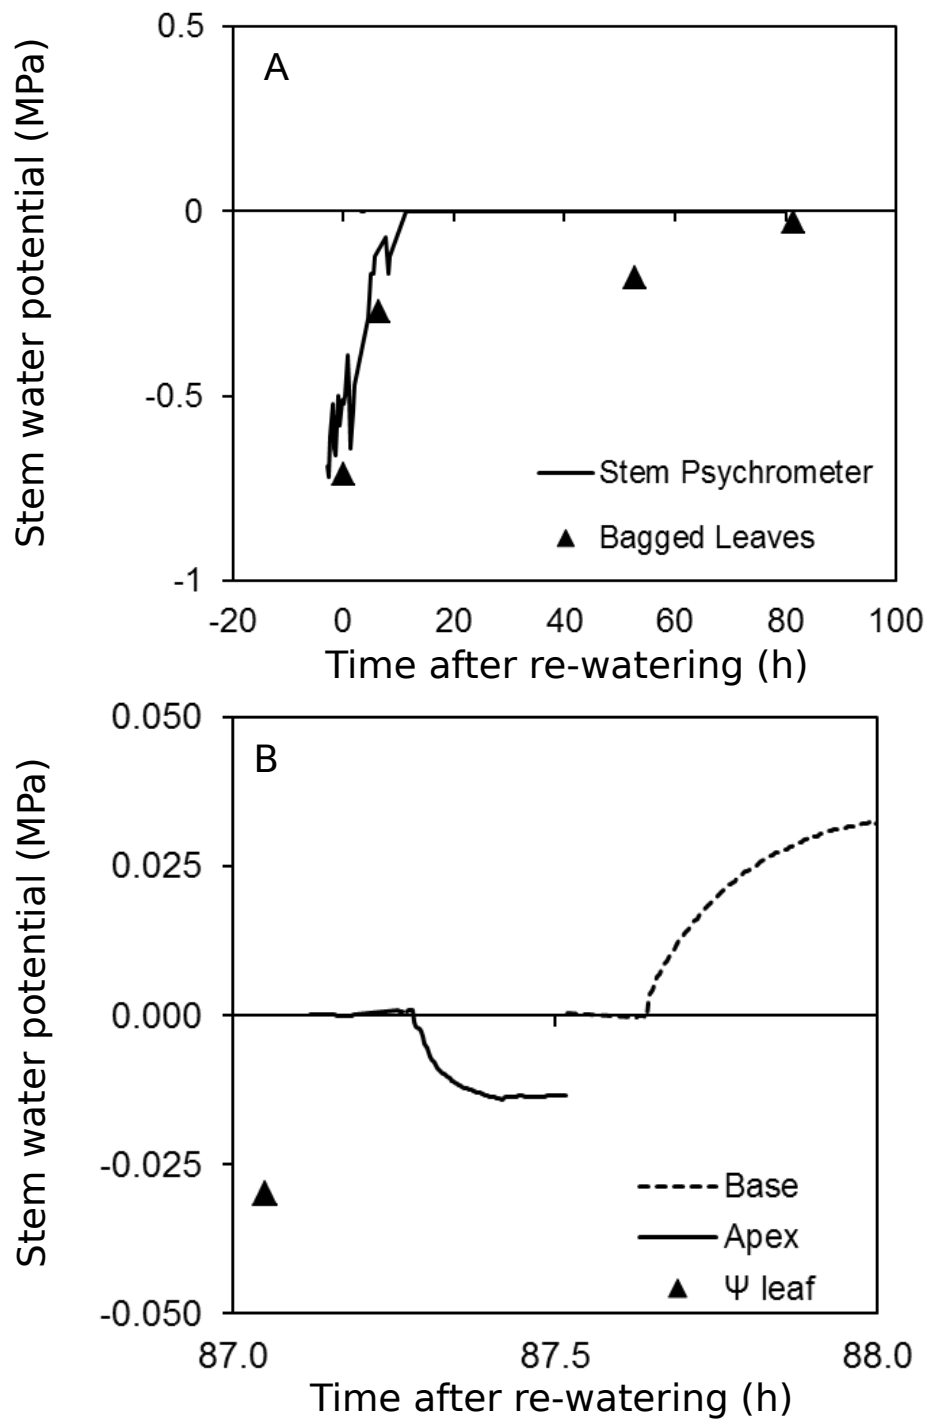

**Figure S2.** Water potential (MPa) *versus* time relative to re-watering ( $t = 0$  h, *i.e.* the rewatering time) in re-watered *Vitis vinifera* plant, measured by stem psychrometer (A) and bagged leaf using pressure chamber ( $\Psi_{leaf}$ , A and B). **B.** After final scan, water potential was slightly negative on bagged leaf using pressure chamber ( $\Psi_{leaf}$ ), and at the apex (*via* pressure transducer, black line), and positive at the base (dotted line).
